# Supplementary material
Source: Research Square preprint supplement (doi:10.21203/rs.3.rs-8980745/v1)
Supplement: Supplementary file 1 [file 988435a57eb28c99813649c2.docx]

**Table S1: Summary of disease-causing mutations in patients included in the study***

| ***Mutations*** | **Genetic ID** | **Clinical effect** |
| --- | --- | --- |
| **c.374C>A (p.T125K) *Heterozygous*** | Allele ID: 526918  Variant type: single nucleotide variant  Cytogenetic location: 12q24.11  Protein exchange: p.T125K  **Genomic location:**  12:110913124 (GRCh38) UCSC  12:111350928 8GRCh37) UCSC | *Familial hypertrophic cardiomyopathy* |
| ***c.1448T>C (rs421016) (p.L483P) Heterozygous*** | *Allele ID: 19327*  *Variant type: single nucleotide variant*  *cytogenetic location:1q22*  *Protein exchange:*  *L483P, L396P, L434P*  **Genomic location:**  *1:155235252 (GRCh38) GRCh38 UCSC*  *1:155205043 (GRCh37) GRCh37 UCSC* | *Late onset Parkinson's*  *Gaucher Types I, II, III*  *Perinatal lethal Gaucher*  *Dementia* |
| ***c.1223C>T (rs75548401) (p.T408M) Heterozygous*** | *Allele ID: 99354*  *Variant type: single nucleotide variant*  *Cytogenetic location: 1q22*  *Protein exchange: T408M, T359M, T321M*  **Genomic location:**  *1:155236246 (GRCh38) UCSC*  *1:155206037 (GRCh37) UCSC* | *Mostly benign*  *Late onset Parkinson's*  *Rarely Perinatal Lethal Gaucher* |

***ClinVar**

**Table S2: Examination of family members (patient A)**

| Relatives | Age and gender | GBA level nmol/ml/h | Genetic Mutation type | Examined regions | Clinical effect of mutation |
| --- | --- | --- | --- | --- | --- |
| Mother | 26 years  female | 1,8 | **c.374C>A (p.T125K) Heterozygous** | GBA gene Exon 1,2,3,4,5,6,7,8,9,10,11 in HGMD database | Possibly harmful**1 |
| Father | 27 years  male | 1.5 | Not Detected | GBA gene Exon 1,2,3,4,5,6,7,8,9,10,11 | - |
| Sister | 3 years  female | 3.8 | Not Detected | GBA gene Exon 1,2,3,4,5,6,7,8,9,10,11 | - |
| Mother’s father | 60 years male | 1.9 | Not Detected | GBA gene Exon 1,2,3,4,5,6,7,8,9,10,11 |  |
| Mother’s mother | 58 years  female | 1 | **c.374C>A (p.T125K) Heterozygous** | GBA gene Exon 1,2,3,4,5,6,7,8,9,10,11 | No association of this mutation with disease in the HGMD database**2 |
| Mother's brother 1 | 23 years Male | 2.2 | Not detected | GBA gene Exon 1,2,3,4,5,6,7,8,9,10,11 | - |
| Mother's brother 2 | 32 years Male | 2.8 | Not detected | GBA gene Exon 1,2,3,4,5,6,7,8,9,10,11 | - |
| Mother's brother 3 | 36 years Male | 2.8 | Not detected | GBA gene Exon 1,2,3,4,5,6,7,8,9,10,11 | - |

**1 At position 374 of the coding sequence, the cytosine nucleotide was converted to adenine. This change caused the amino acid lysine to replace threonine at position 125 of the protein. The clinical significance of this finding, which is not included in the Clinvar database, is unknown.

**2 The cytosine nucleotide at position 374 of the coding sequence was converted to adenine. This change caused the amino acid lysine to replace threonine at position 125 of the protein. The clinical significance of this finding, which is not included in the Clinvar database, is unknown.

**Gaucher’s disease**

**FMF Carrier**

**Dead Man**

**Dead WOMAN**

**FMF disease**


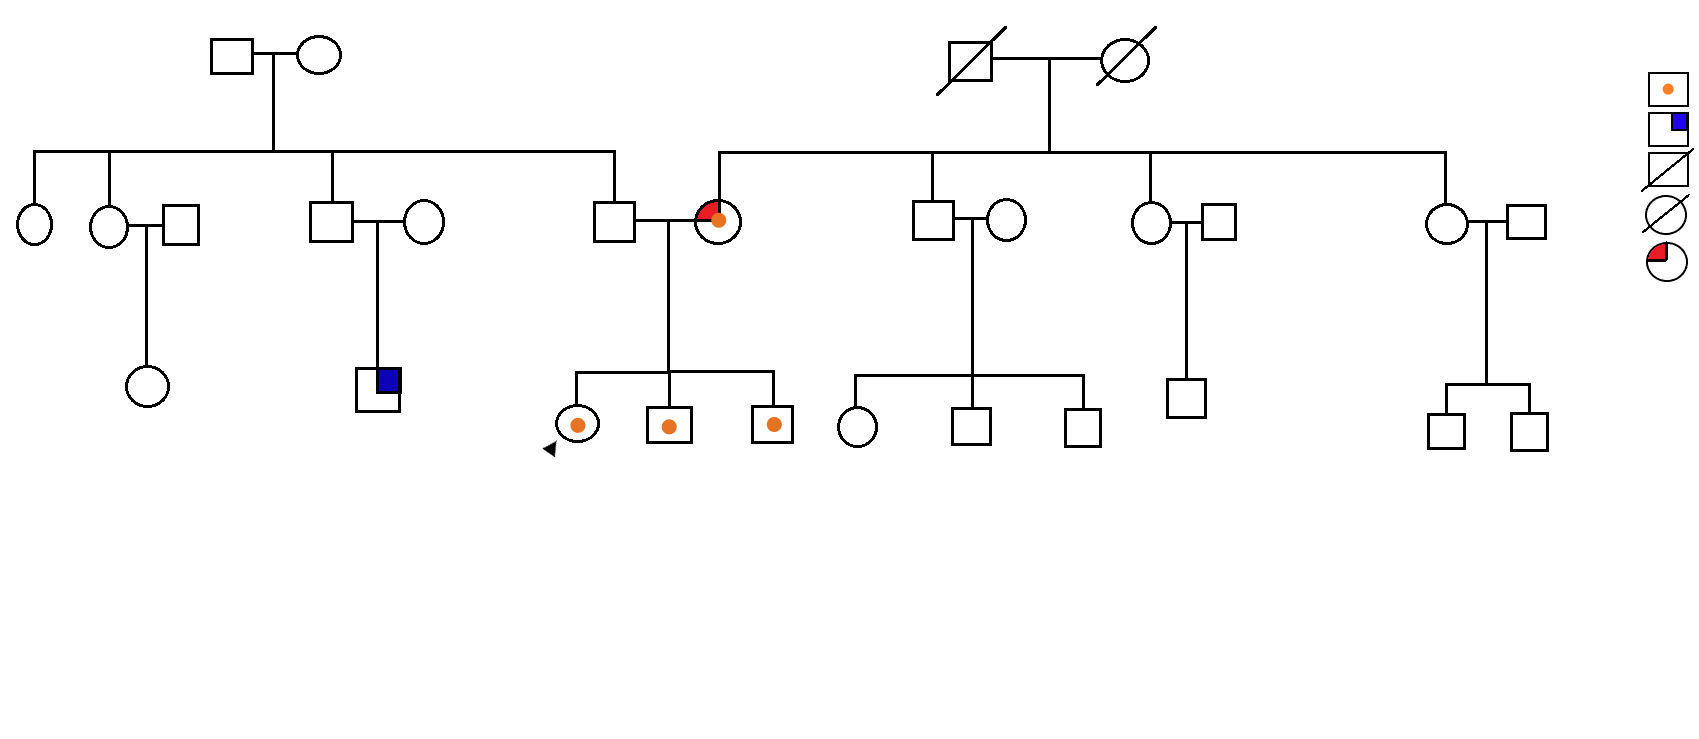


**Figure S1. Pedigree tree for patient A with mutation**

**Table S3 . Examination of family members (patient B)**

| Relatives | Age and gender | GBA level nmol/ml/h | Genetic Mutation type | Examined regions | Clinical effect of mutation |
| --- | --- | --- | --- | --- | --- |
| **Mother** | 27 years, female | 2.4 | **c.1448T>C (rs421016) (p.L483P) Heterozygous** | GBA gene Exon 1, 2, 3, 4, 5, 6, 7, 8, 9, 10 .11 | Carrier for Gaucher disease |
| **Father** | 29 years, male | Not included in the study for social reasons | | | |
| **Brother 1** | 3 years, male | 2.90 | **c.1448T>C (rs421016) (p.L483P) Heterozygous** | GBA gene Exon 1, 2, 3, 4, 5, 6, 7, 8, 9, 10 .11 | Carrier for Gaucher disease |
| **Brother 2** | 2 years, male | 2.7 | **c.1448T>C (rs421016) (p.L483P) Heterozygous** | GBA gene Exon 1, 2, 3, 4, 5, 6, 7, 8, 9, 10 .11 | Carrier for Gaucher disease |

***Study could not be conducted on the individuals mentioned because the grandmother and mother's father died early.


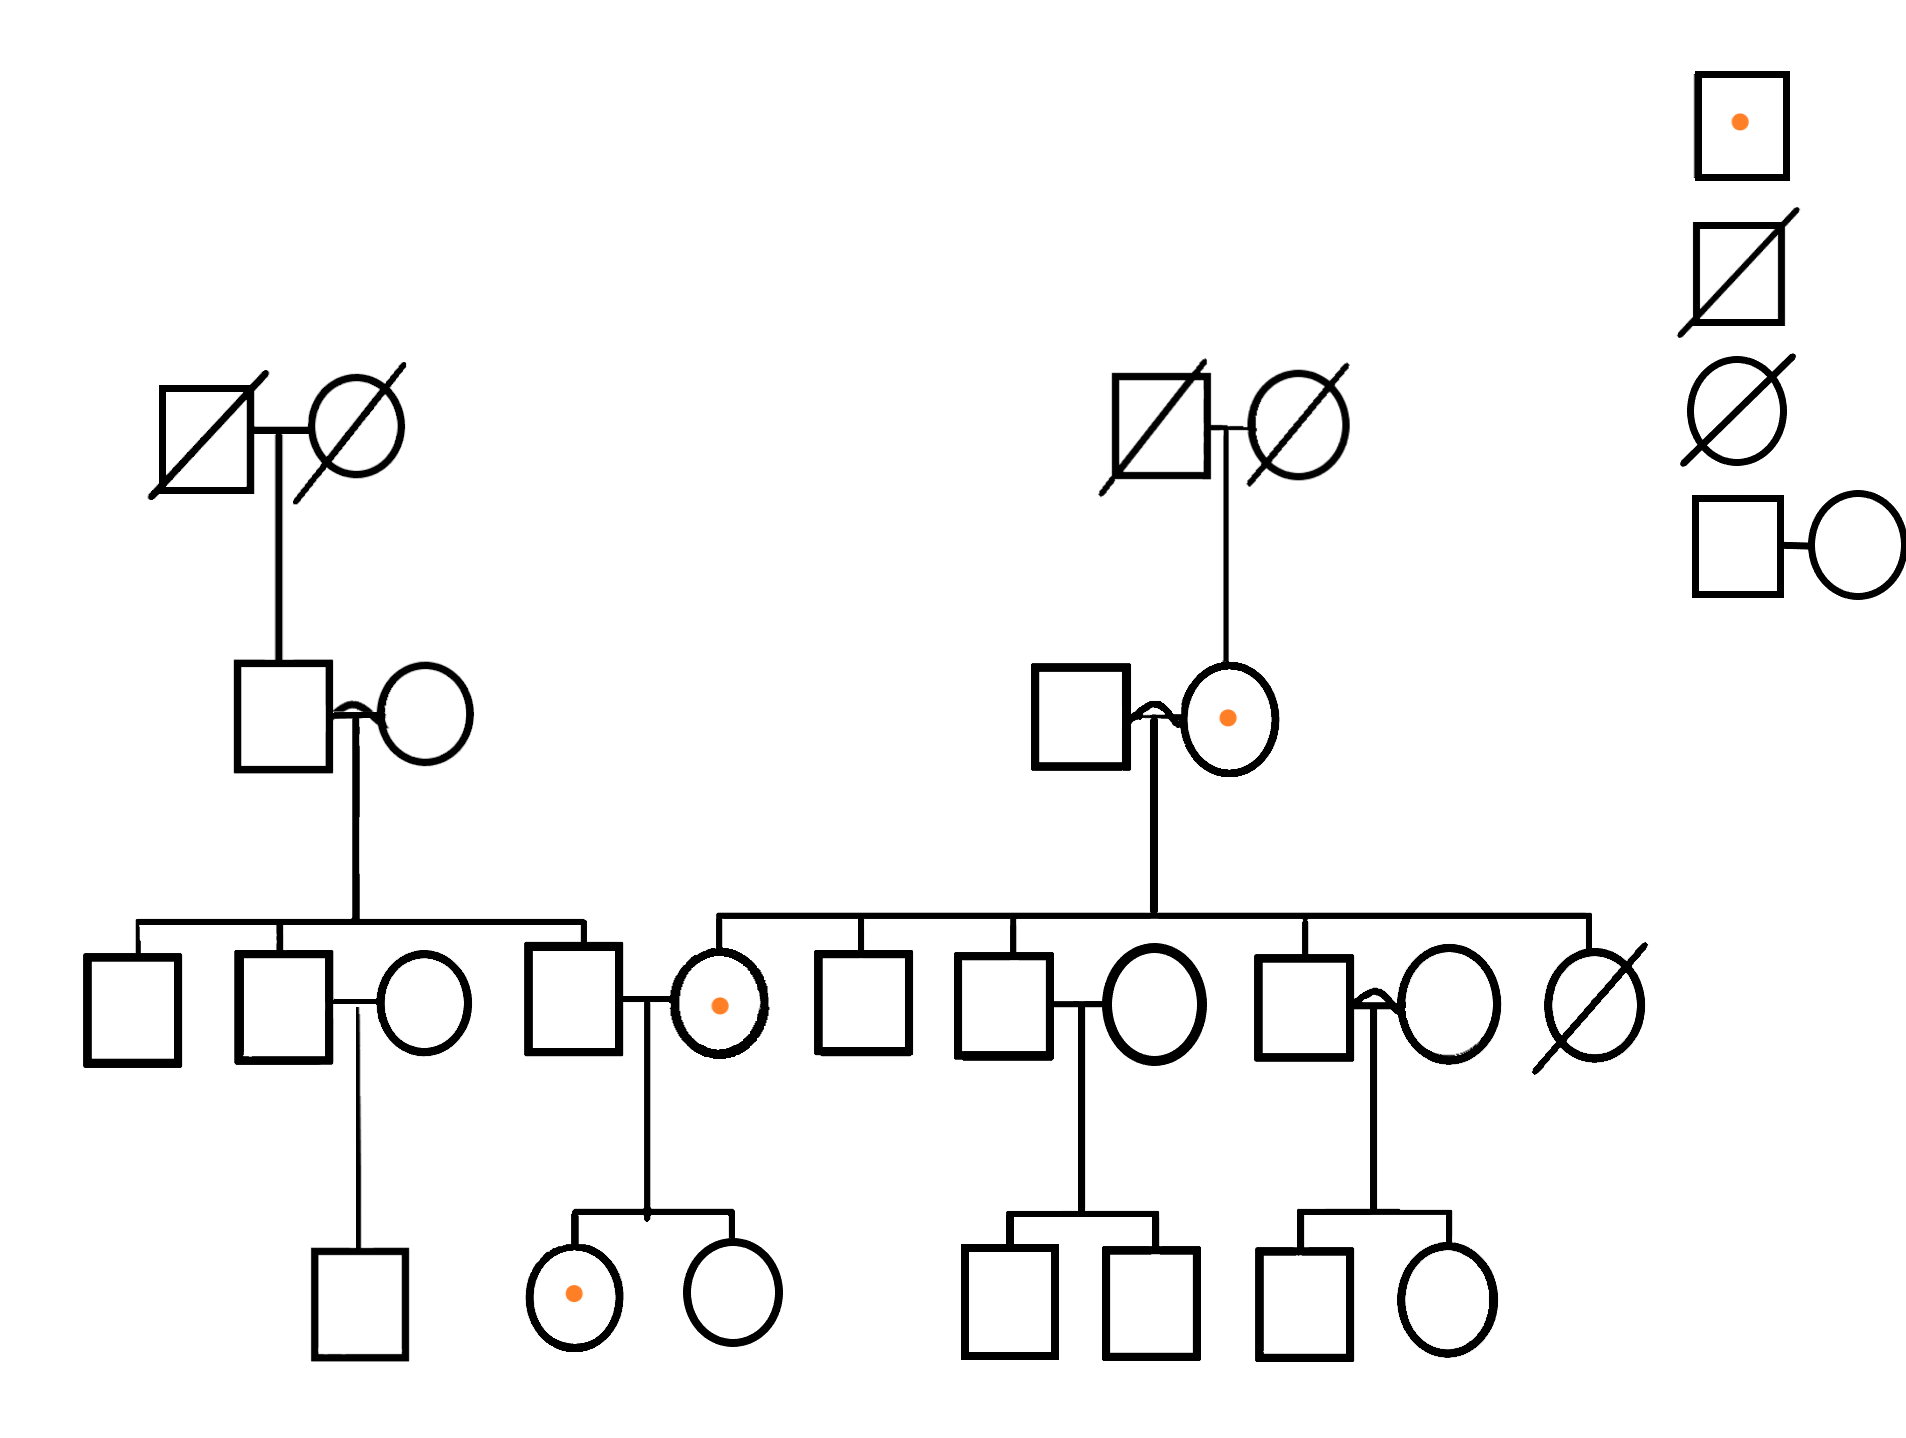


**Gaucher heterozygous mutation**

**Dead Man**

**Dead Woman**

**Consanguineous marriage**

**Figure S2. Pedigree tree for patient B with mutation**

**Table S4: Comparison of newborn Gaucher screening: Hungary vs OMUFM**

|  |  |  |
| --- | --- | --- |
|  | **Hungary** | **OMUFM** |
| Number screened | 40,021 | 107 |
| GBA activity cutoff | 3.5 μmol/L/hour | <5 μmol/L/hour |
| Number below cutoff | 16 | 29 |
| Enzyme activity in below-cutoff group | 3.26 μmol/L/hour | Mean 3.83 μmol/L/hour |
| Number with genetic testing | 16 | 11 |
| Number with confirmed diagnosis (genetics) | 3 | 1 |
| Number with detected mutations | 10 (total mutations); 2 heterozygous; 5 carriers; 3 diagnostic | 3 Gaucher / 2 Niemann-Pick |
| Detected mutations (confirmed Gaucher cases) | c.1448T>C (p.L483P) c.1483G>C (p.A495P) | c.1448T>C (rs421016) (p.L483P) heterozygous |
| Number of carriers | Total 7 | 2 |
| Carrier-associated mutations | c.1223C>T (p.T408M) c.1226A>G (p.N409S) c.475C>T (p.R159W) | *c.374C>A (p.T125K) heterozygous; c.1223C>T (rs75548401) (p.T408M) heterozygous |
| Reported incidence | 1/13,341* | 3/107* |

**Table S5: Comparison of newborn Gaucher screening: China vs OMUFM**

|  | **CHINA** | **OMUFM** |
| --- | --- | --- |
| Number screened | 80,844 | 107 |
| GBA activity cutoff | 30.07 μmol/L/hour | <5 μmol/L/hour |
| Number below cutoff | 11 | 29 |
| Enzyme activity in below-cutoff group | 2.64 μmol/L/hour | Mean 3.83 μmol/L/hour |
| Number with genetic testing | 3 | 11 |
| Number with detected mutations | 1 | 3 Gaucher / 2 Niemann-Pick |
| Detected mutations | c.1448T>C (L483P) c.907C>A (L303I) | *c.374C>A (p.T125K) heterozygous; c.1448T>C (rs421016) (p.L483P) heterozygous; c.1223C>T (rs75548401) (p.T408M) heterozygous |
| Reported incidence | 1/80,855 | 3/107 |

*Mutations recorded for Gaucher.
